# Supplementary material
Source: Springer Nature journal article supplement (https://www.springermedizin.de/resource/supplementary/13002_2009_157_MOESM10_ESM.pdf/9627278)

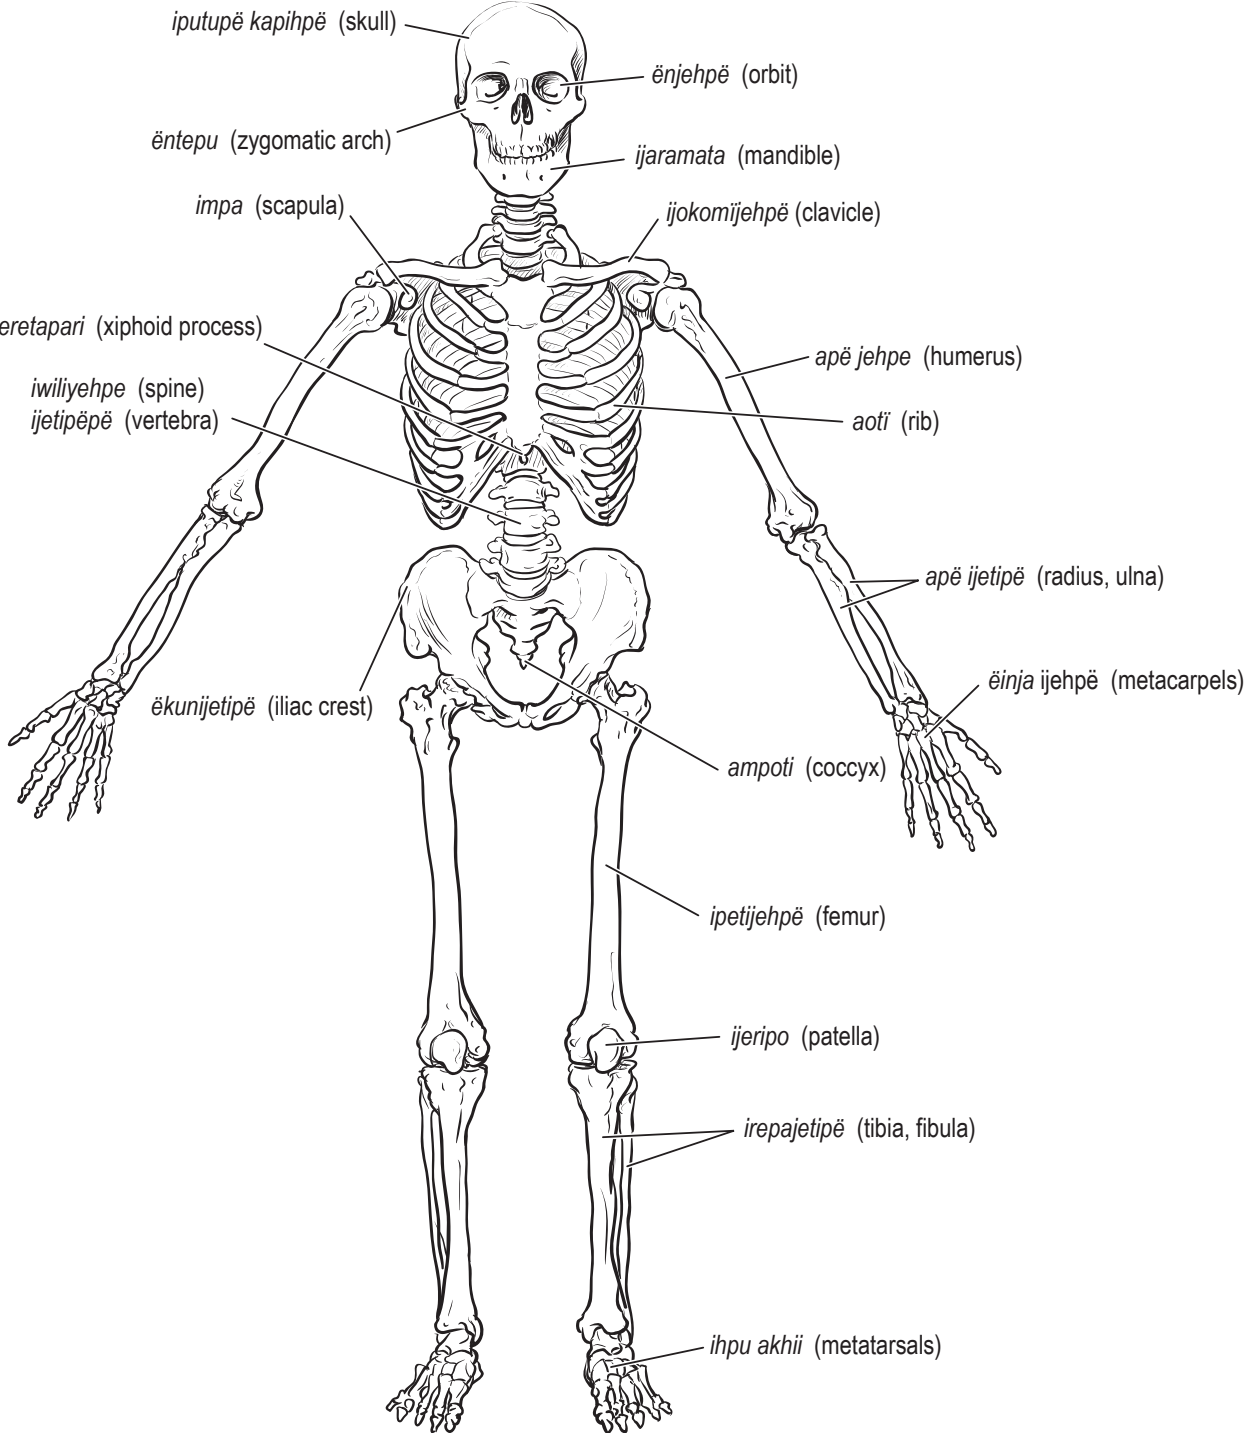

Supplement: MOESM10 [file 9627278]
